# Supplementary material for: Electronic-dimensionality reduction of bulk MoS2 by hydrogen treatment
Source: Royal Society of Chemistry journal article supplement (doi:10.1039/c8cp02365d), 2018-01-01
Supplement: c8cp02365d1.pdf [file c8cp02365d1.pdf]

## Supporting information

### Electronic-dimensionality Reduction of Bulk MoS<sub>2</sub> by Hydrogen Treatment

Soohyun Cho,<sup>a,b</sup> Beom Seo Kim,<sup>b,c</sup> Beomyoung Kim,<sup>d</sup> Wonshik Kyung,<sup>b,c,d</sup> Jeongjin Seo,<sup>a,b</sup> Min Park,<sup>c</sup> Jun Woo Jeon,<sup>f,g</sup> Kiyohisa Tanaka,<sup>h</sup>  
Jonathan D. Denlinger,<sup>d</sup> Changyoung Kim,<sup>b,c</sup> Dorj Odkhuu,<sup>\*f</sup> Byung Hoon Kim<sup>\*f,g</sup> and Seung Ryong Park<sup>\*,f</sup>

<sup>a</sup> Institute of Physics and Applied Physics, Yonsei University, Seoul, 03722, Korea.

<sup>b</sup> Center for Correlated Electron Systems, Institute for Basic Science, Seoul, 08826, Korea.

<sup>c</sup> Department of Physics and Astronomy, Seoul National University, Seoul, 08826, Korea.

<sup>d</sup> Advanced Light Source, Lawrence Berkeley National Laboratory, Berkeley, California 94720, USA.

<sup>e</sup> Institute of Advanced Composite Materials, Korea Institute of Science and Technology, Joellabuk-do 55324, Korea.

<sup>f</sup> Department of Physics, Incheon National University, Incheon, 22012, Korea.

<sup>g</sup> Research Institute of Basic Sciences, Incheon National University, Incheon, 22012, Korea.

<sup>h</sup> UVSOR Facility, Institute for Molecular Science and Graduate University for Advanced Studies, Okazaki, 444-8585, Japan.

E-mail : odkhuu@inu.ac.kr; kbh37@inu.ac.kr; AbePark@inu.ac.kr

#### Contents:

Figure S1: (a) The atomic force microscopy (AFM) amplitude image and (b) AFM height profile along the white line in AFM image with before (black line) and after (red line) hydrogen treatment MoS<sub>2</sub>. The average thickness of exfoliated few-layer MoS<sub>2</sub> after the treatment is thinned by about 9.85 nm compared to that before the treatment.

Figure S2: (a) Results of the relative energy of bilayer MoS<sub>2</sub> with (red) and without (black) a sulfur vacancy as a function of the reduction in interlayer spacing. For each, the total energies corresponding to the optimized interlayer distance (3.183 Å) of the vacancy-free pristine MoS<sub>2</sub> are taken as reference energy (zero). In contrast to the pristine MoS<sub>2</sub>, the relative energy of the vacancy-included MoS<sub>2</sub> decreases as the interlayer distance reduces, reaching its minimum at around 2 % reduction of the interlayer distance. This indicates that the presence of a sulfur vacancy in hydrogen-treated MoS<sub>2</sub> results in reduced interlayer spacing between MoS<sub>2</sub> layers. (b) The calculated band gap energy of the vacancy-free pristine MoS<sub>2</sub> as function of the interlayer spacing. The bandgap energy is reduced by about 0.285 eV at the 2 % reduced interlayer spacing, which corresponds to the equilibrium interlayer distance for MoS<sub>2</sub> with a sulfur vacancy.

Figure S3: The simulation of the process of the hydrogen treatment. (a) Hydrogen molecule easily penetrates into the particular layer of MoS<sub>2</sub>. The interlayer distance between the Mo planes is found to be about 0.71 nm. The total energy of MoS<sub>2</sub> before hydrogen treatment is taken as reference energy (zero). (b) The system energy with the chemical reaction between the hydrogen and sulfur atoms, where both H atoms of H<sub>2</sub> chemisorb to one of S atoms in MoS<sub>2</sub>, is lower by ~4.38 eV than that without the chemical reaction. The Mo-Mo interlayer distance increases by about 0.18 nm compared to the distance without the reaction. (c) Finally, sulfur escapes from the crystal through the formation of H<sub>2</sub>S. In this case, the distance is more than 1 nm, and the system energy is still lower than that without the hydrogen treatment. The red arrows in (a) and (c) indicate the in- and out-movement of the hydrogen gas away from the MoS<sub>2</sub> layers, respectively.

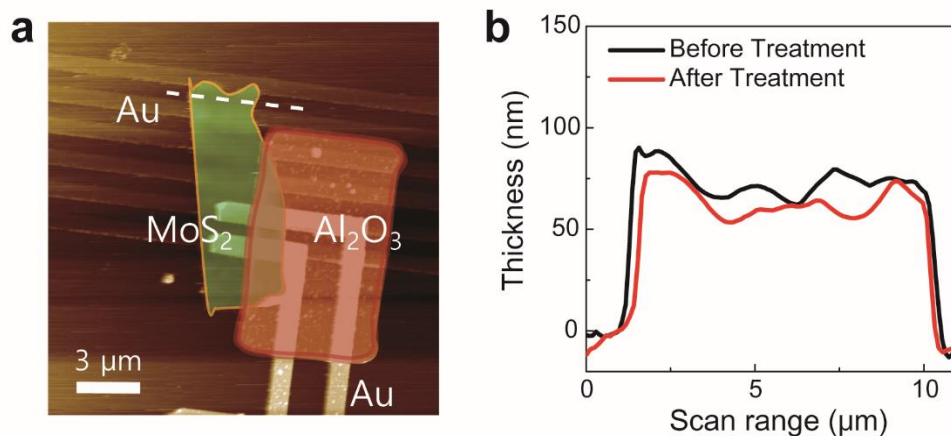

**Figure S1:** (a) The atomic force microscopy (AFM) image and (b) AFM height profile along the white line in the AFM image before (black line) and after (red line) hydrogen treatment. The average thickness of exfoliated few-layer MoS<sub>2</sub> after the treatment is reduced by 9.85 nm after the treatment.

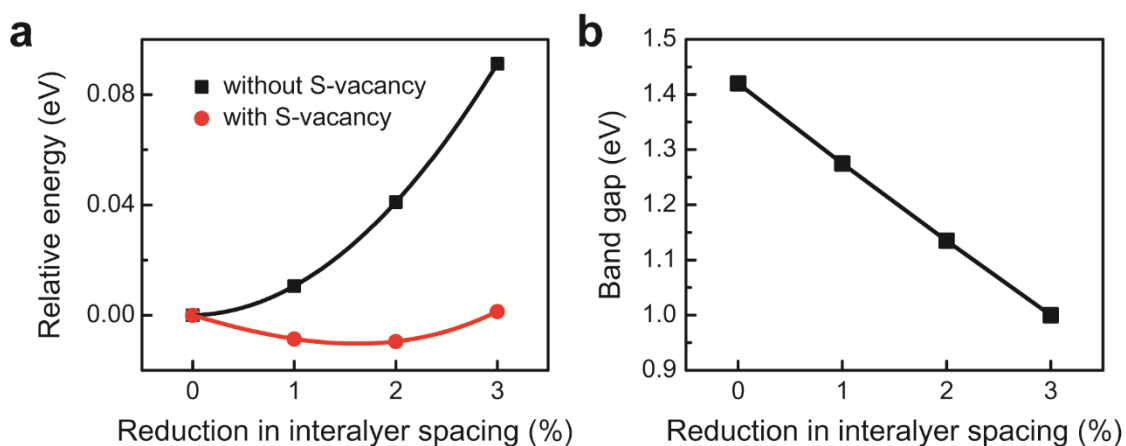

**Figure S2:** (a) Results of the relative energy of bilayer MoS<sub>2</sub> with (red) and without (black) a sulfur vacancy as a function of the reduction in interlayer spacing. For each, the total energies corresponding to the optimized interlayer distance (3.183 Å) of the vacancy-free pristine MoS<sub>2</sub> are taken as reference energy (zero). In contrast to the pristine MoS<sub>2</sub>, the relative energy of the vacancy-included MoS<sub>2</sub> decreases as the interlayer distance reduces, reaching its minimum at around 2 % reduction of the interlayer distance. This indicates that the presence of a sulfur vacancy in hydrogen-treated MoS<sub>2</sub> results in reduced interlayer spacing between MoS<sub>2</sub> layers. (b) The calculated band gap energy of the vacancy-free pristine MoS<sub>2</sub> as function of the interlayer spacing. The bandgap energy is reduced by about 0.285 eV at the 2 % reduced interlayer spacing, which corresponds to the equilibrium interlayer distance for MoS<sub>2</sub> with a sulfur vacancy.

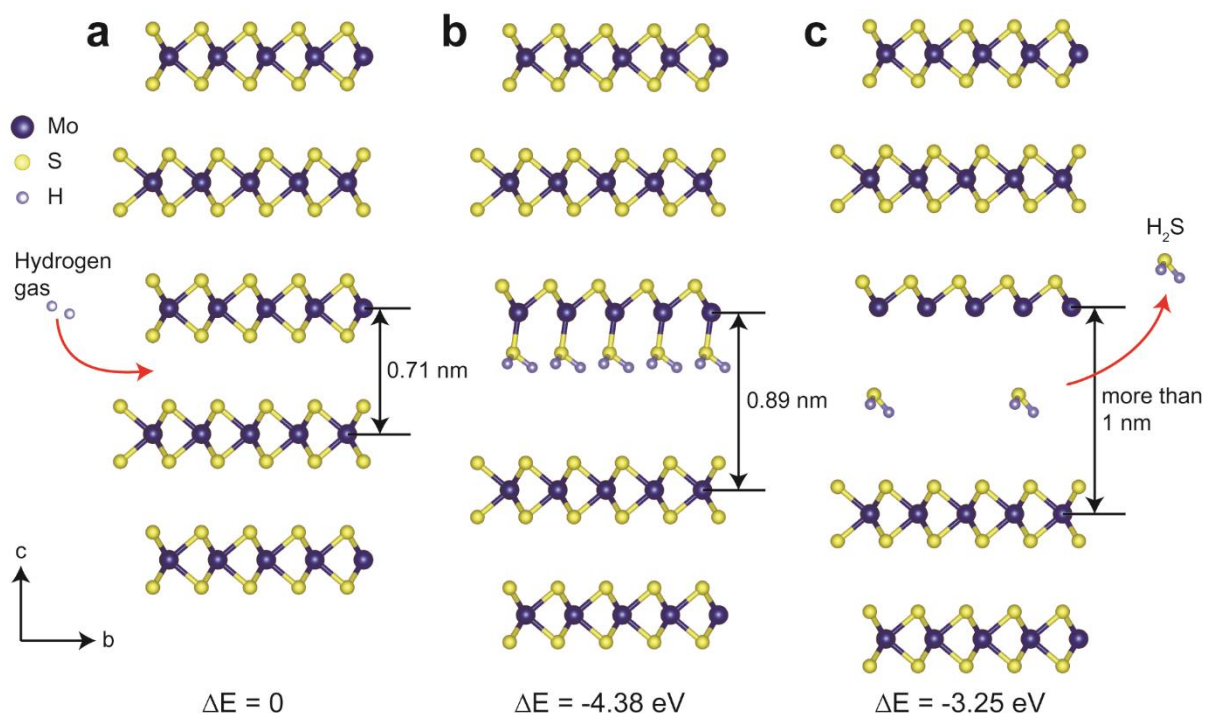

**Figure S3:** The simulation of the process of the hydrogen treatment. (a) Hydrogen molecule easily penetrates into the particular layer of MoS<sub>2</sub>. The interlayer distance between the Mo planes is found to be about 0.71 nm. The total energy of MoS<sub>2</sub> before hydrogen treatment is taken as reference energy (zero). (b) The system energy with the chemical reaction between the hydrogen and sulfur atoms, where both H atoms of H<sub>2</sub> chemisorb to one of S atoms in MoS<sub>2</sub>, is lower by  $\sim 4.38$  eV than that without the chemical reaction. The Mo-Mo interlayer distance increases by about 0.18 nm compared to the distance without the reaction. (c) Finally, sulfur escapes from the crystal through the formation of H<sub>2</sub>S. In this case, the distance is more than 1 nm, and the system energy is still lower than that without the hydrogen treatment. The red arrows in (a) and (c) indicate the in- and out-movement of the hydrogen gas away from the MoS<sub>2</sub> layers, respectively.
